# Supplementary material for: Exploration of novel cationic amino acid-enriched short peptides: design, SPPS, biological evaluation and in silico study
Source: Royal Society of Chemistry journal article supplement (doi:10.1039/d3ra08313f), 2024-01-01

## Exploration of Novel Cationic Amino Acid-Enriched Short Peptides: Design, SPPS, Biological Evaluation and *in Silico* Study

Prashant C. Chandole,<sup>a</sup> Tushar Janardan Pawar,<sup>b</sup> José Luis Olivares-Romero,<sup>b</sup> Sunil R. Tivari,<sup>a</sup>  
Bianney Garcia Lara,<sup>c</sup> Harun Patel,<sup>d</sup> Iqrar Ahmad,<sup>d</sup> Enrique Delgado-Alvarado,<sup>e</sup> Siddhant V.  
Kokate<sup>f\*</sup> and Yashwantsinh Jadeja<sup>a\*</sup>

<sup>a</sup>Department of Chemistry, Marwadi University, Rajkot-360003, Gujarat, India.

<sup>b</sup>Red de Estudios Moleculares Avanzados, Clúster Científico y Tecnológico BioMimic del  
Instituto de Ecología, A.C. Carretera Antigua a Coatepec 351, Xalapa, 91073, Veracruz, México

<sup>c</sup>Departamento de Química, Universidad de Guanajuato, Noria Alta S/N, Guanajuato-36050,  
Guanajuato, Mexico.

<sup>d</sup>Department of Pharmaceutical Chemistry, R C. Patel Institute of Pharmaceutical Education and  
Research, Shirpur District Dhule-425405, Maharashtra, India.

<sup>e</sup>Micro and Nanotechnology Research Center, Universidad Veracruzana, Blvd. Av. Ruiz  
Cortines No. 455 Fracc. Costa Verde, Boca del Río 94294, Mexico.

<sup>f</sup>Department of Chemistry, S.S.C. College, Junnar, Pune-410502, Maharashtra, India.

Correspondence to: -

Dr. Yashwantsinh Jadeja, Assistant Professor, Department of Chemistry, Marwadi University,  
Rajkot-360003, Gujarat (India).

Email: [drysjadeja@gmail.com](mailto:drysjadeja@gmail.com) and [siddhantkokate@gmail.com](mailto:siddhantkokate@gmail.com)

## Abbreviations

|       |                                         |
|-------|-----------------------------------------|
| Ala   | Alanine                                 |
| Arg   | Arginine                                |
| Cys   | Cysteine                                |
| ESI   | Electron spray ionization               |
| Fmoc  | Fluorenylmethyloxycarbonyl              |
| Gly   | Glycine                                 |
| His   | Histidine                               |
| Trt   | Tryl                                    |
| Ile   | Isoleucine                              |
| Leu   | Leucine                                 |
| MHz   | Mega Hertz                              |
| Mmol  | Milli mole                              |
| MS    | Mass Spectroscopy                       |
| MTCC  | Microbial Type Culture Collection       |
| µg/mL | Microgram per milli liter               |
| Pbf   | 2,2,4,6,7-Pentamethyldihydrobenzofurane |
| Pro   | Proline                                 |
| Val   | Valine                                  |
| Ser   | Serine                                  |
| tBu   | Tertiary Butyl                          |
| Tyr   | Tyrosine                                |
| TIS   | Triisopropyl Silane                     |
| v/v   | Volume by volume                        |

## Characterization data:

**H-Gly-Cys-Pro-His-Arg-Cys-OH (7a):** Yield - 89%; mp: 230-234 °C; <sup>1</sup>H NMR (500 MHz, )  $\delta$  14.36 (s, 1H), 8.96 (s, 1H), 8.79 (d,  $J$  = 6.7 Hz, 1H), 8.36 (d,  $J$  = 11.8 Hz, 1H), 8.10 (d,  $J$  = 5.4 Hz, 4H), 7.76 (d,  $J$  = 30.4 Hz, 1H), 7.35 (s, 2H), 4.69 (s, 1H), 4.61 (d,  $J$  = 5.2 Hz, 1H), 4.43 (d,  $J$  = 3.7 Hz, 1H), 4.33 (d,  $J$  = 3.4 Hz, 2H), 3.68 (d,  $J$  = 7.1 Hz, 4H), 3.10 (d,  $J$  = 3.5 Hz, 4H), 2.98 (m, 1H), 2.88 – 2.87 (dd,  $J$  = 14.3, 7.7 Hz, 1H), 2.80 -2.78 (dd,  $J$  = 8.2, 5.3 Hz, 2H), 2.60 (s, 2H), 2.41 (d,  $J$  = 7.5 Hz, 1H), 2.03 (d,  $J$  = 6.1 Hz, 1H), 1.88 (s, 1H), 1.84 (d,  $J$  = 5.4 Hz, 1H), 1.77 (s, 1H), 1.74 (d,  $J$  = 5.5 Hz, 2H), 1.53 (d,  $J$  = 4.1 Hz, 4H); <sup>13</sup>C NMR (126 MHz, DMSO)  $\delta$  171.60, 171.29, 169.76, 168.22, 165.93, 159.00, 156.94, 133.72, 129.14, 117.05, 64.94, 59.69, 54.50, 53.20, 52.32, 51.52, 47.32, 40.45, 29.21, 29.13, 26.88, 25.62, 25.51, 24.93, 24.43; HRMS (ESI<sup>+</sup>) calculated for C<sub>13</sub>H<sub>19</sub>NO<sub>2</sub> [M+Na]<sup>+</sup>: 694.2530, found: 694.2521.

**H-Ala-Cys-Pro-His-Arg-Cys-OH (7b):** Yield - 85%; mp: 225-229 °C; <sup>1</sup>H NMR (500 MHz, )  $\delta$  14.32 (s, 1H), 8.96 (s, 1H), 8.71 (d,  $J$  = 6.7 Hz, 1H), 8.34 (dd,  $J$  = 18.1, 7.5 Hz, 1H), 8.14 (s, 2H), 8.07 (d,  $J$  = 6.2 Hz, 1H), 7.75 (s, 1H), 7.31 (s, 2H), 4.59 (d,  $J$  = 6.0 Hz, 2H), 4.39 (d,  $J$  = 3.7 Hz, 1H), 4.28 (s, 2H), 3.87 (s, 2H), 3.64 (s, 4H), 3.34 (d,  $J$  = 6.6 Hz, 1H), 3.06 (s, 4H), 2.94 (dd,  $J$  = 14.0, 7.5 Hz, 1H), 2.86 – 2.80 (m, 1H), 2.78 – 2.72 (m, 2H), 2.59 (s, 1H), 2.37 (t,  $J$  = 7.5 Hz, 1H), 2.00 (s, 1H), 1.85 – 1.79 (m, 2H), 1.70 (d,  $J$  = 4.9 Hz, 2H), 1.48 (s, 2H), 1.28 (d,  $J$  = 5.9 Hz, 3H), 1.04 (t,  $J$  = 6.4 Hz, 1H); <sup>13</sup>C NMR (126 MHz, )  $\delta$  171.63, 171.30, 169.78, 169.52, 168.17, 158.85, 156.96, 133.74, 129.14, 117.08, 64.97, 59.70, 54.52, 53.55, 52.34, 51.53, 48.06, 47.27, 40.47, 29.19, 26.90, 25.53, 24.95, 24.51, 17.14, 15.19; HRMS (ESI<sup>+</sup>) calculated for C<sub>13</sub>H<sub>19</sub>NO<sub>2</sub> [M+Na]<sup>+</sup>: 708.2682, found: 708.2653.

**H-Val-Cys-Pro-His-Arg-Cys-OH (7c):** Yield - 80%; mp: 222-226 °C; <sup>1</sup>H NMR (500 MHz, )  $\delta$  14.24 (s, 1H), 8.94 (s, 1H), 8.78 (d,  $J$  = 6.6 Hz, 1H), 8.35 (dd,  $J$  = 21.2, 7.6 Hz, 2H), 8.19 (s, 2H), 8.11 (d,  $J$  = 6.2 Hz, 1H), 7.81 (d,  $J$  = 15.7 Hz, 1H), 7.35 (s, 2H), 4.69 – 4.56 (m, 2H), 4.43 (d,  $J$  = 3.8 Hz, 1H), 4.32 (s, 2H), 3.69 (d,  $J$  = 6.3 Hz, 4H), 3.37 (d,  $J$  = 6.6 Hz, 1H), 3.10 (s, 4H), 2.98 (dd,  $J$  = 14.1, 7.3 Hz, 1H), 2.87 (d,  $J$  = 7.9 Hz, 1H), 2.84 – 2.73 (m, 2H), 2.66 (s, 2H), 2.42 (s, 1H), 2.04 (d,  $J$  = 5.6 Hz, 2H), 1.89 (d,  $J$  = 5.6 Hz, 1H), 1.86 – 1.80 (m, 1H), 1.75 (dd,  $J$  = 11.2, 5.7 Hz, 2H), 1.56 (s, 1H), 1.52 (d,  $J$  = 5.7 Hz, 2H), 0.90 (d,  $J$  = 3.7 Hz, 6H); <sup>13</sup>C NMR (126 MHz, )  $\delta$  171.65, 171.31, 169.78, 168.23, 167.92, 158.99, 156.99, 133.73, 129.18, 117.10, 59.68, 57.20, 54.54, 53.62, 52.35, 51.58, 47.34, 40.46, 29.93, 29.21, 25.53, 25.26, 24.96, 24.53, 18.25, 17.66; HRMS (ESI<sup>+</sup>) calculated for C<sub>13</sub>H<sub>19</sub>NO<sub>2</sub> [M+Na]<sup>+</sup>: 736.2999, found: 736.2985.

**H-Leu-Cys-Pro-His-Arg-Cys-OH (7d):** Yield - 80%; mp: 218-222 °C; <sup>1</sup>H NMR (500 MHz, )  $\delta$  14.36 (s, 1H), 8.95 (s, 1H), 8.87 (d,  $J$  = 6.8 Hz, 1H), 8.34 (dd,  $J$  = 20.0, 7.6 Hz, 1H), 8.19 (s, 2H), 7.71 (s, 1H), 7.32 (t,  $J$  = 15.6 Hz, 4H), 7.24 (d,  $J$  = 5.6 Hz, 1H), 4.66 (d,  $J$  = 5.9 Hz, 2H), 4.61 (d,  $J$  = 5.7 Hz, 2H), 4.43 (d,  $J$  = 3.8 Hz, 1H), 4.33 (s, 2H), 3.83 (s, 1H), 3.69 (s, 1H), 3.64 (d,  $J$  = 5.3 Hz, 1H), 3.37 (dd,  $J$  = 13.5, 6.7 Hz, 1H), 3.10 (s, 4H), 2.99 (dd,  $J$  = 14.6, 7.5 Hz, 1H), 2.87 (d,  $J$  = 8.2 Hz, 1H), 2.82-2.79 (m, 1H), 2.64 (s, 1H), 2.42 (t,  $J$  = 7.9 Hz, 1H), 2.04 (d,  $J$  = 6.2 Hz, 1H), 1.94-1.87 (m, 1H), 1.82 (dd,  $J$  = 11.7, 6.1 Hz, 1H), 1.75 (dd,  $J$  = 15.9, 10.0 Hz, 2H), 1.61 (dd,  $J$  = 13.0, 6.6 Hz, 1H), 1.52 (s, 4H), 1.08 (t,  $J$  = 7.0 Hz, 1H), 0.87 (s, 6H); <sup>13</sup>C NMR (126 MHz, )  $\delta$  171.64, 171.32, 169.79, 169.04, 168.16, 156.92, 144.19, 117.41, 117.09, 115.07, 64.97, 59.70,

54.54, 53.56, 52.36, 51.58, 50.79, 47.31, 40.49, 40.19, 29.23, 25.54, 25.37, 24.95, 24.47, 23.57, 22.65, 21.84, 15.19; HRMS (ESI<sup>+</sup>) calculated for C<sub>13</sub>H<sub>19</sub>NO<sub>2</sub> [M+H]<sup>+</sup>: 728.3336, found: 728.3307.

**H-Pro-Cys-Pro-His-Arg-Cys-OH (7e):** Yield - 80%; mp: 218-222 °C; <sup>1</sup>H NMR (500 MHz, ) δ 14.35 (s, 1H), 9.68 (s, 1H), 8.92 (s, 1H), 8.54 (d, *J* = 19.5 Hz, 1H), 8.36 (s, 1H), 8.09 (d, *J* = 58.8 Hz, 1H), 7.82 (s, 1H), 7.35-7.29 (m, 4H), 7.24 (s, 1H), 4.83 (s, 1H), 4.61 (d, *J* = 5.2 Hz, 2H), 4.52 (s, 1H), 4.43 (d, *J* = 1.8 Hz, 1H), 4.33 (s, 2H), 4.26 (s, 1H), 3.69 (s, 1H), 3.61 (s, 1H), 3.38 (dd, *J* = 13.7, 6.8 Hz, 1H), 3.21 (s, 2H), 3.12 (s, 1H), 3.10 (s, 2H), 3.00 (d, *J* = 7.1 Hz, 1H), 2.85 (d, *J* = 8.8 Hz, 1H), 2.76 (d, *J* = 30.8 Hz, 1H), 2.66 (s, 1H), 2.40 (s, 1H), 2.31 (d, *J* = 4.7 Hz, 1H), 2.05 (s, 1H), 1.85 (d, *J* = 4.6 Hz, 4H), 1.77 (d, *J* = 7.3 Hz, 1H), 1.75 (s, 2H), 1.56 (s, 1H), 1.51 (d, *J* = 4.5 Hz, 2H); <sup>13</sup>C NMR (126 MHz, ) δ 171.61, 171.28, 169.78, 168.19, 159.10, 156.98, 144.15, 117.75, 117.07, 115.40, 59.70, 58.85, 54.52, 53.81, 52.33, 51.55, 45.73, 40.44, 40.02, 29.49, 29.12, 26.77, 25.49, 25.28, 24.90, 24.83, 24.49, 23.51; HRMS (ESI<sup>+</sup>) calculated for C<sub>13</sub>H<sub>19</sub>NO<sub>2</sub> [M+H]<sup>+</sup>: 712.3023, found: 712.3036.

**H-Tyr-Cys-Pro-His-Arg-Cys-OH (7f):** Yield - 80%; mp: 218-222 °C; <sup>1</sup>H NMR (500 MHz, ) δ 14.31 (s, 1H), 8.91 (d, *J* = 25.2 Hz, 1H), 8.38 (d, *J* = 40.0 Hz, 1H), 8.19 (s, 2H), 8.09 (s, 1H), 7.78 (s, 1H), 7.31 (s, 3H), 7.24 (s, 2H), 6.98 (s, 2H), 6.67 (s, 2H), 4.83 (s, 1H), 4.62 (s, 2H), 4.43 (s, 1H), 4.33 (s, 1H), 4.01 (s, 4H), 3.63 (s, 4H), 3.42 (s, 1H), 3.10 (s, 4H), 3.00 (d, *J* = 5.0 Hz, 2H), 2.94 (d, *J* = 20.0 Hz, 2H), 2.79 (d, *J* = 5.0 Hz, 1H), 2.41 (s, 1H), 2.03 (s, 1H), 1.74 (d, *J* = 25.0 Hz, 4H), 1.51 (d, *J* = 15.0 Hz, 4H); <sup>13</sup>C NMR (126 MHz, ) δ 171.61, 171.29, 169.76, 167.98, 159.01, 156.62, 144.14, 130.49, 129.09, 128.13, 124.51, 117.68, 117.05, 115.27, 59.62, 54.51, 53.37, 53.19, 52.32, 51.57, 47.19, 40.46, 36.00, 29.16, 29.09, 26.86, 25.48, 25.41, 24.91, 24.83, 24.30, 24.21; HRMS (ESI<sup>+</sup>) calculated for C<sub>13</sub>H<sub>19</sub>NO<sub>2</sub> [M+H]<sup>+</sup>: 778.3129, found: 778.3115.

7a

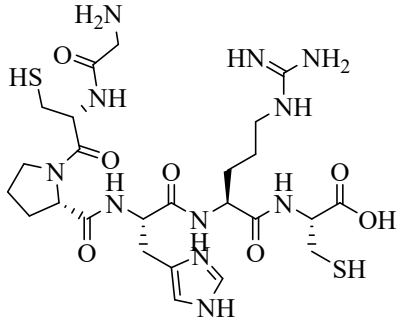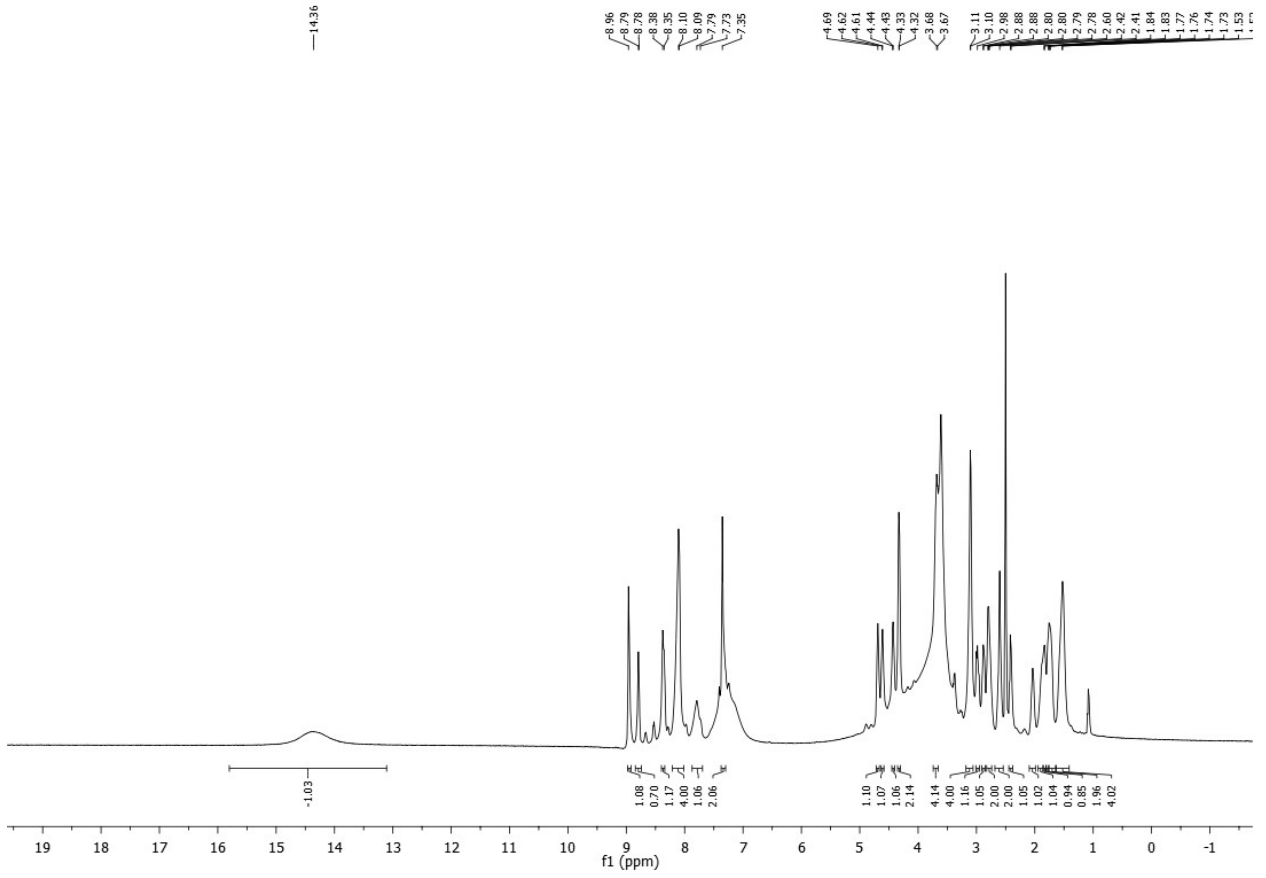

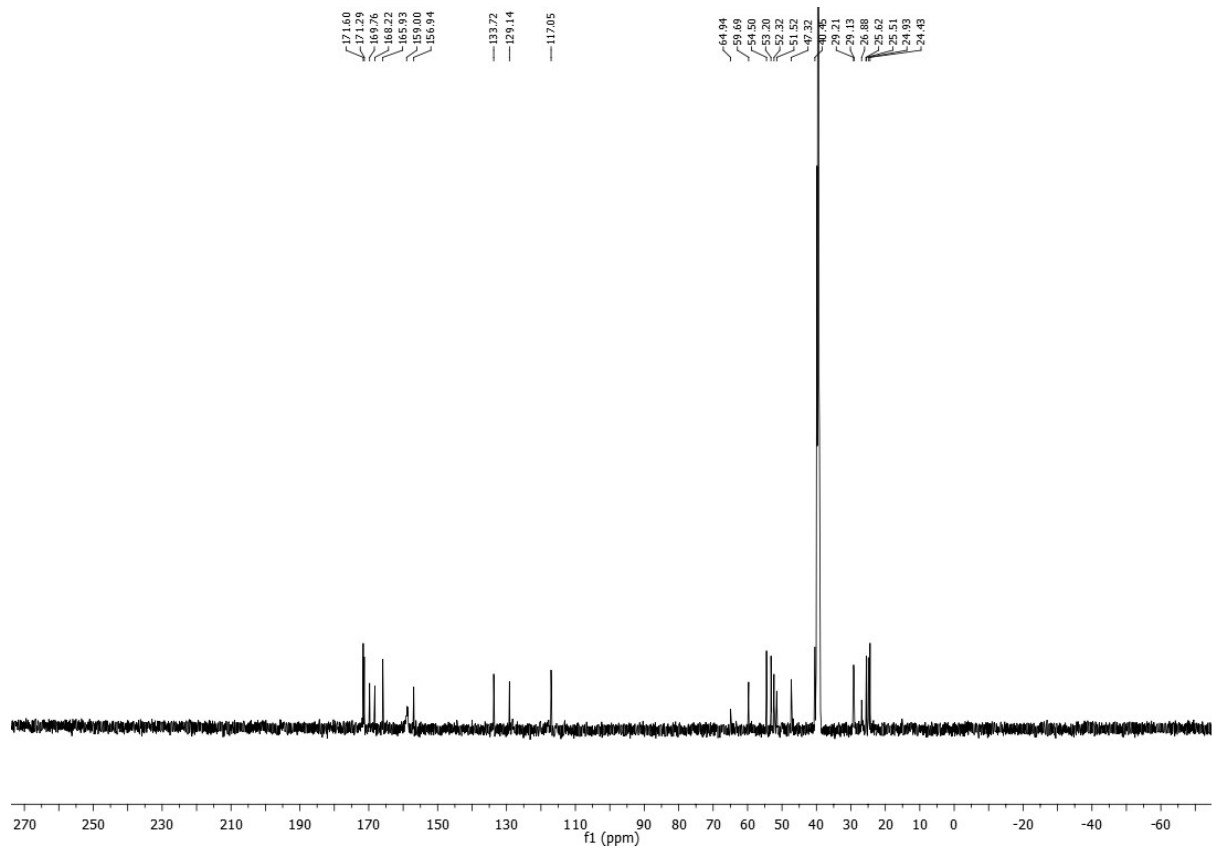

7b

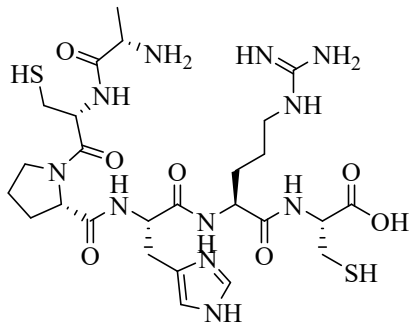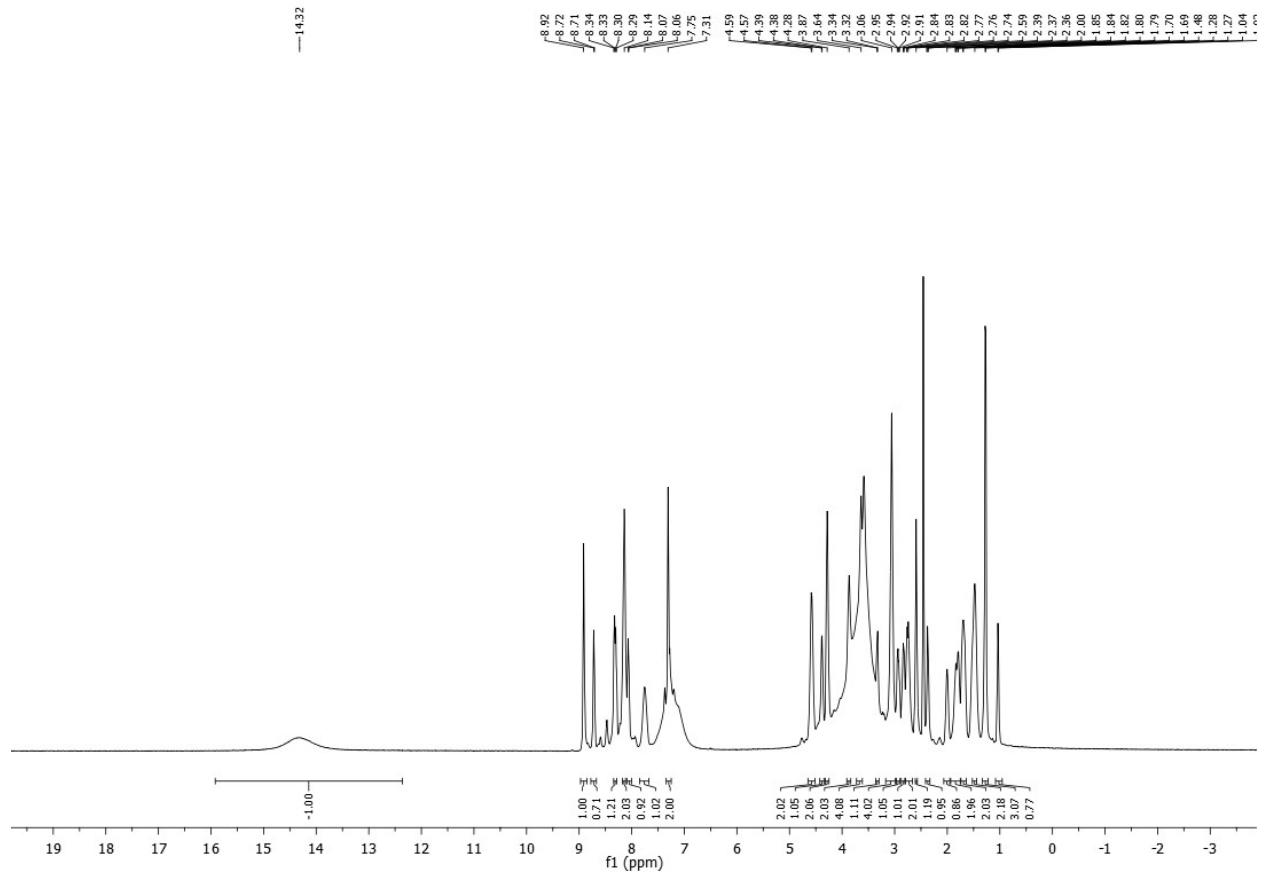

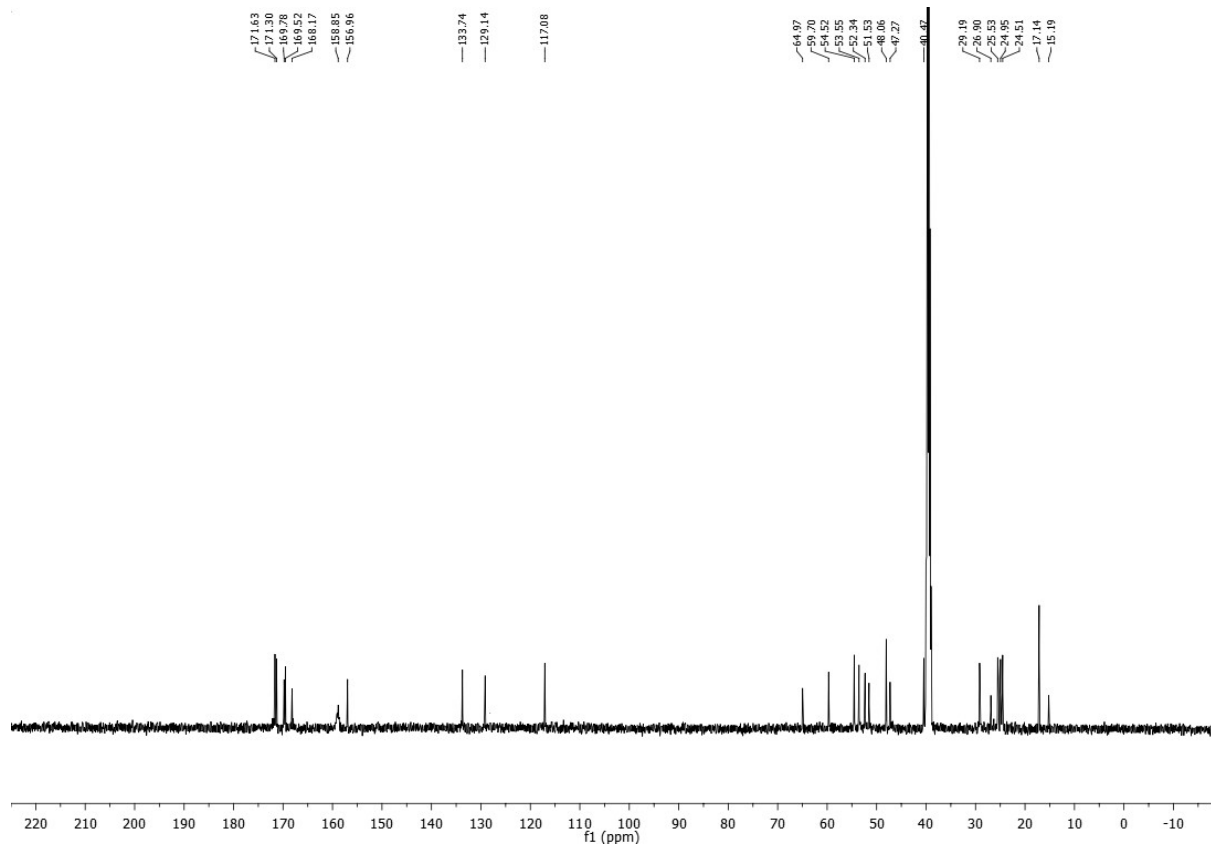



7c

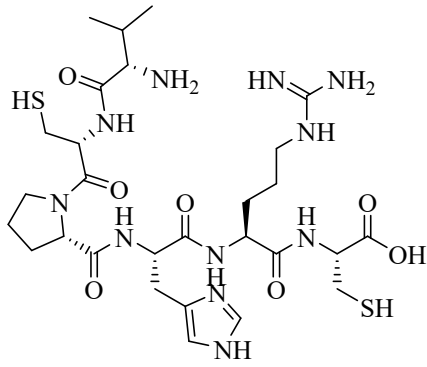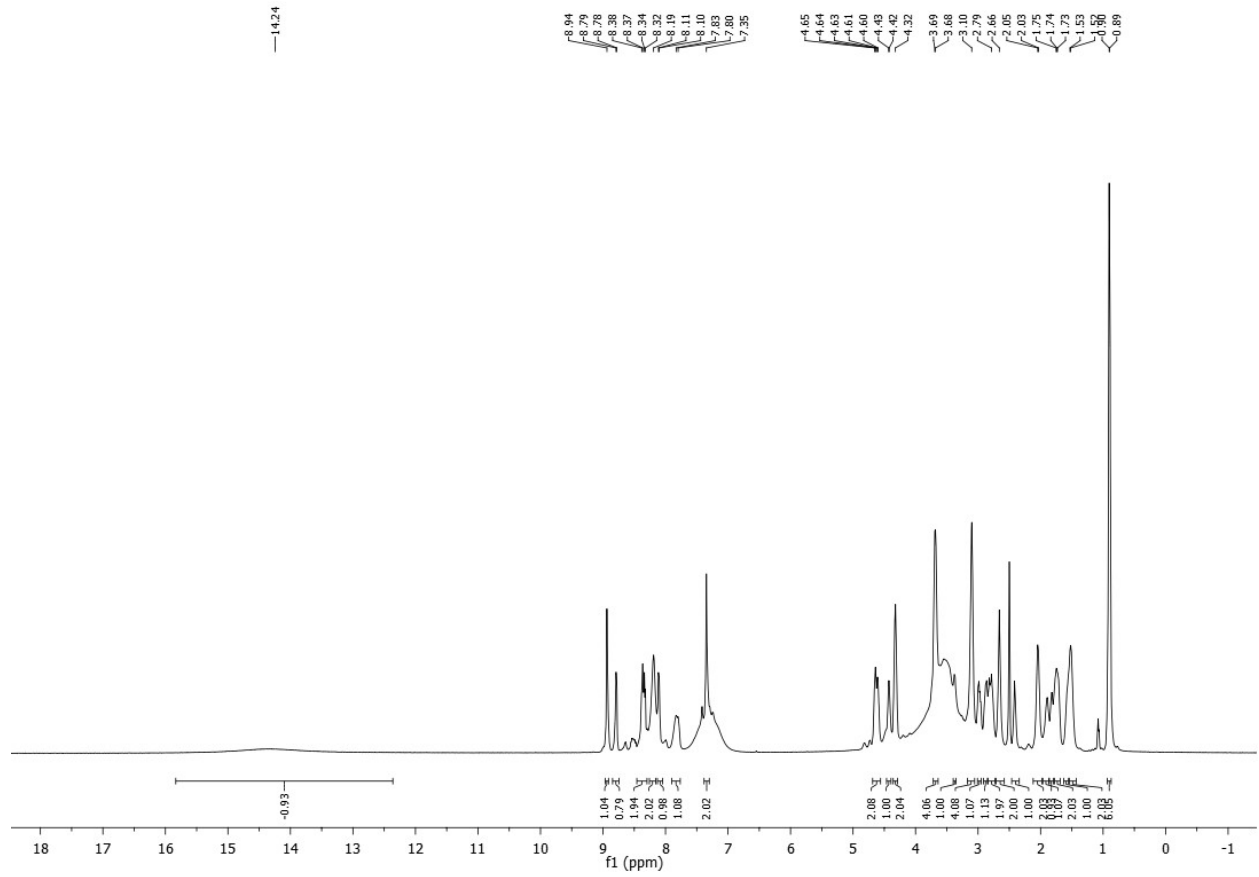

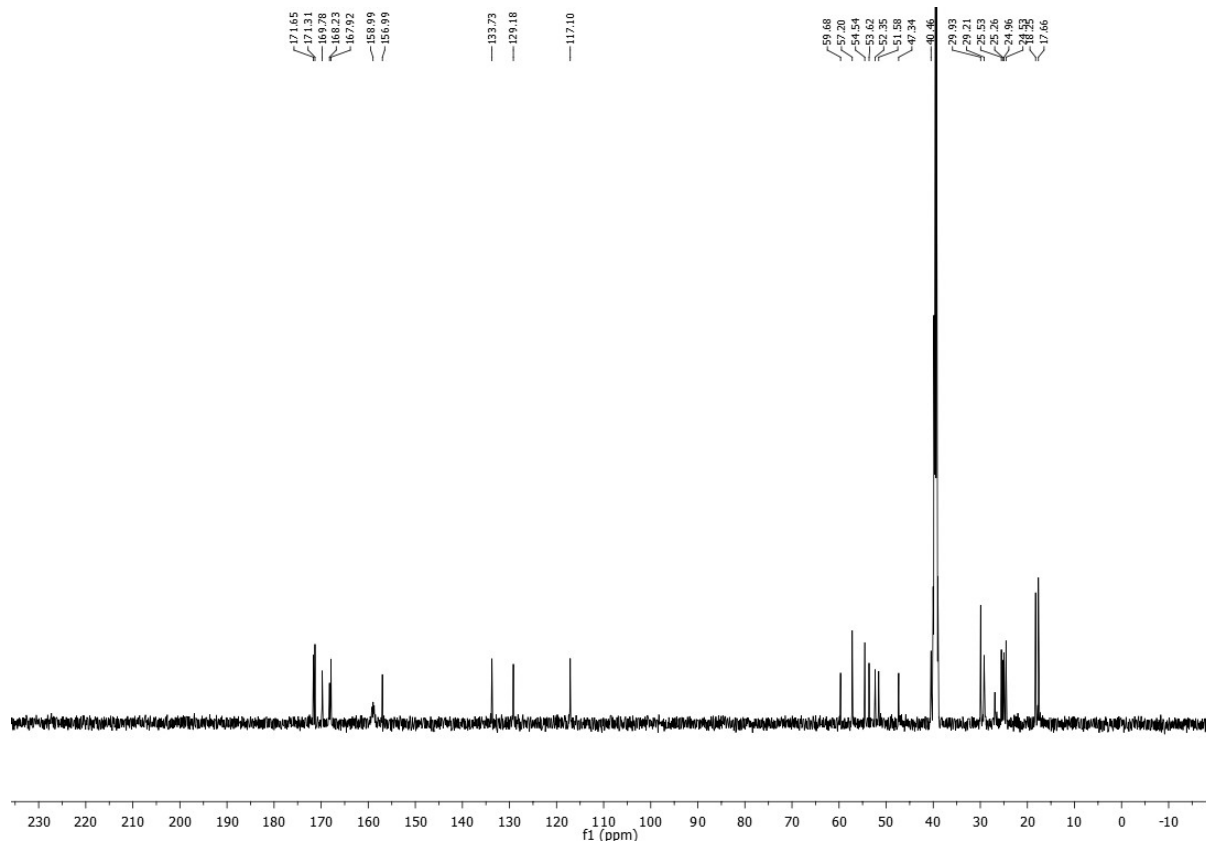

7d

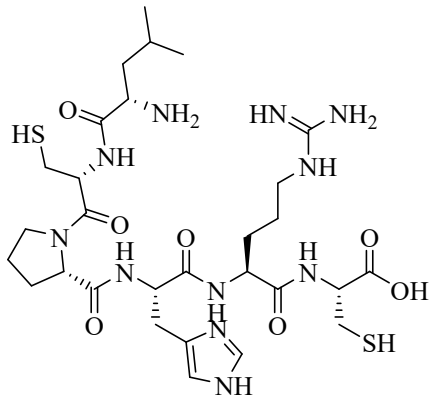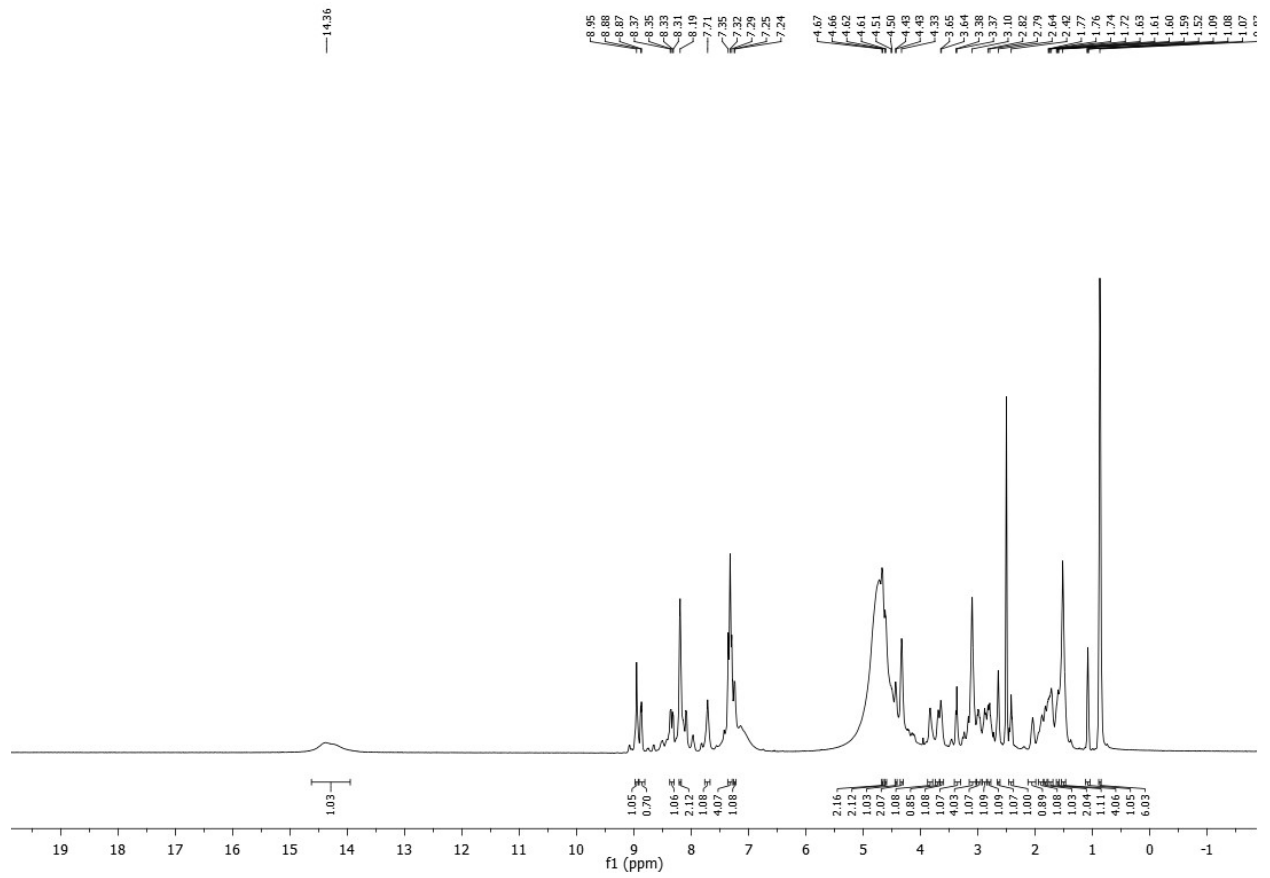

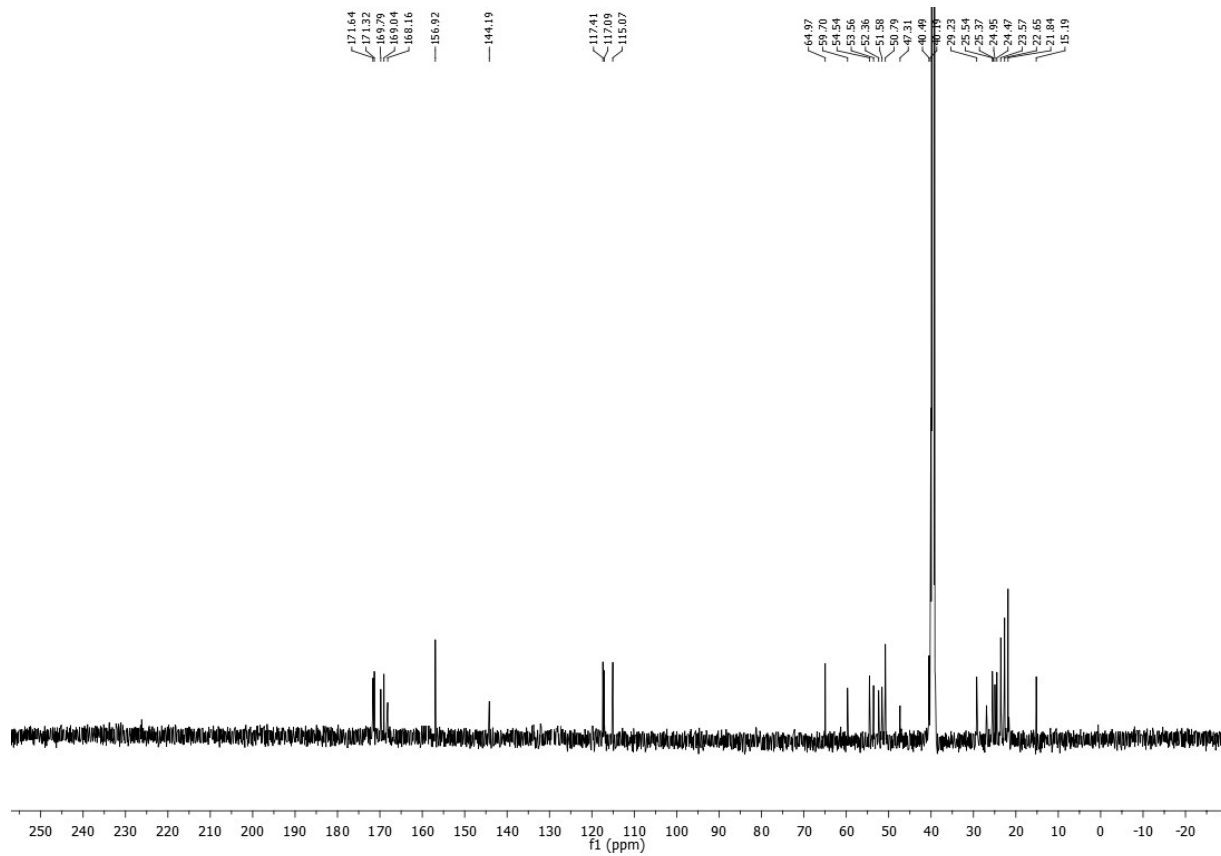

7e

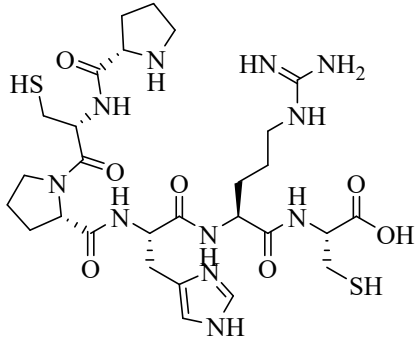

-14.35

9.68  
8.92  
8.55  
8.52  
8.36  
8.09  
7.97  
7.82  
7.35  
7.31  
7.30  
7.24  
4.83  
4.61  
4.60  
4.52  
4.48  
4.48  
4.33  
3.68  
3.61  
3.40  
3.38  
3.37  
3.36  
3.21  
3.10  
3.00  
2.99  
2.86  
2.79  
2.73  
2.66  
2.40  
2.32  
2.31  
2.05  
1.86  
1.85  
1.78  
1.76  
1.62  
1.52  
1.51

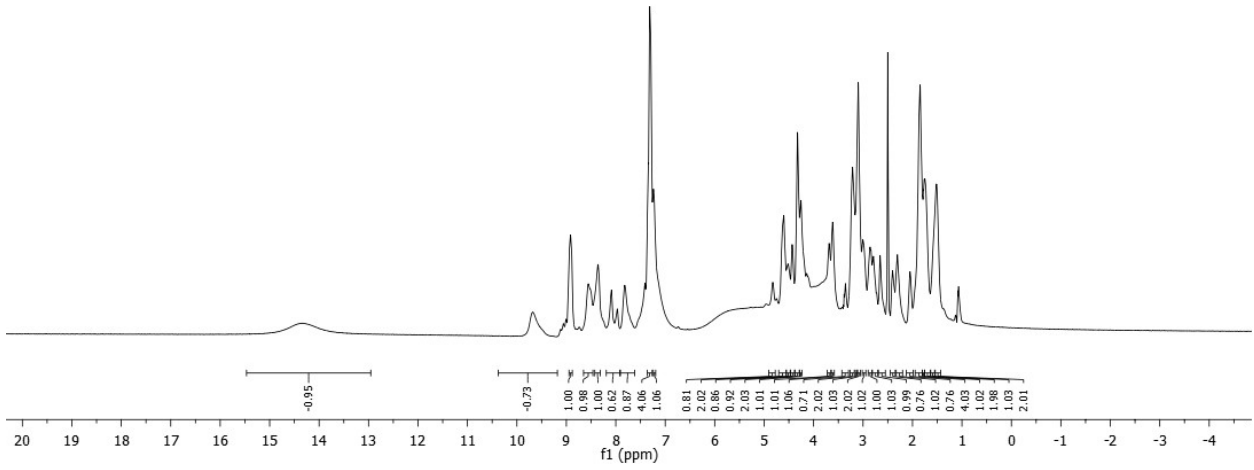

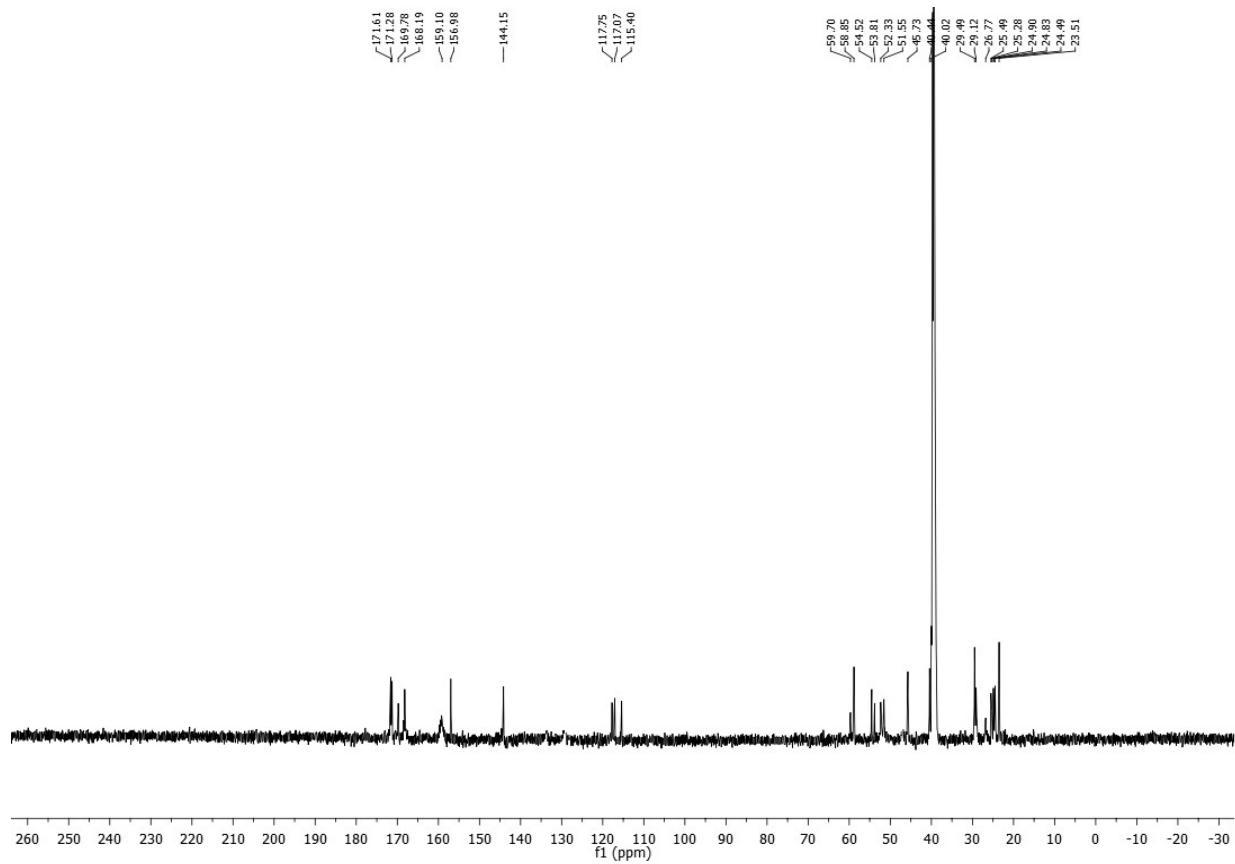

7f

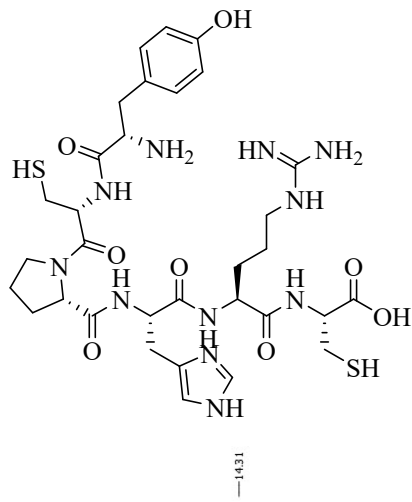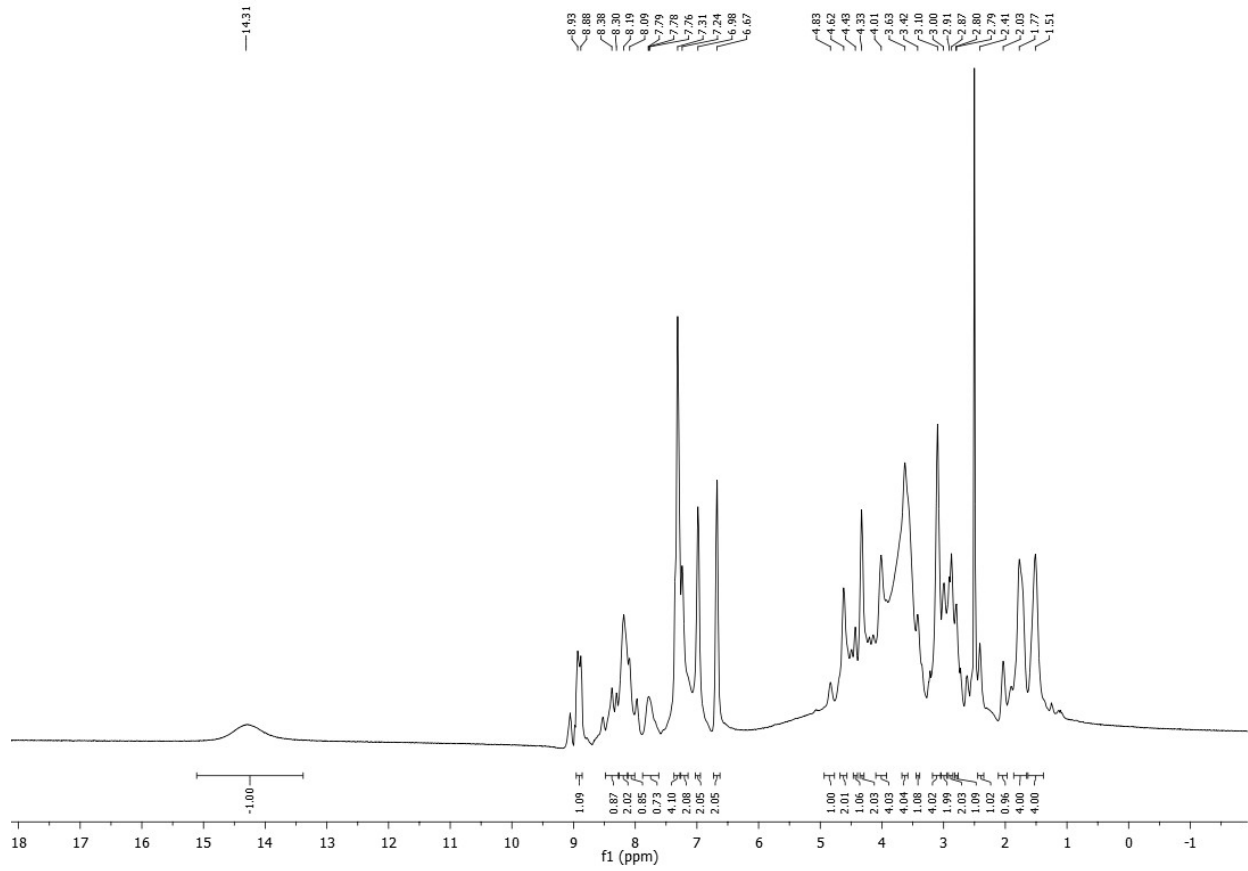

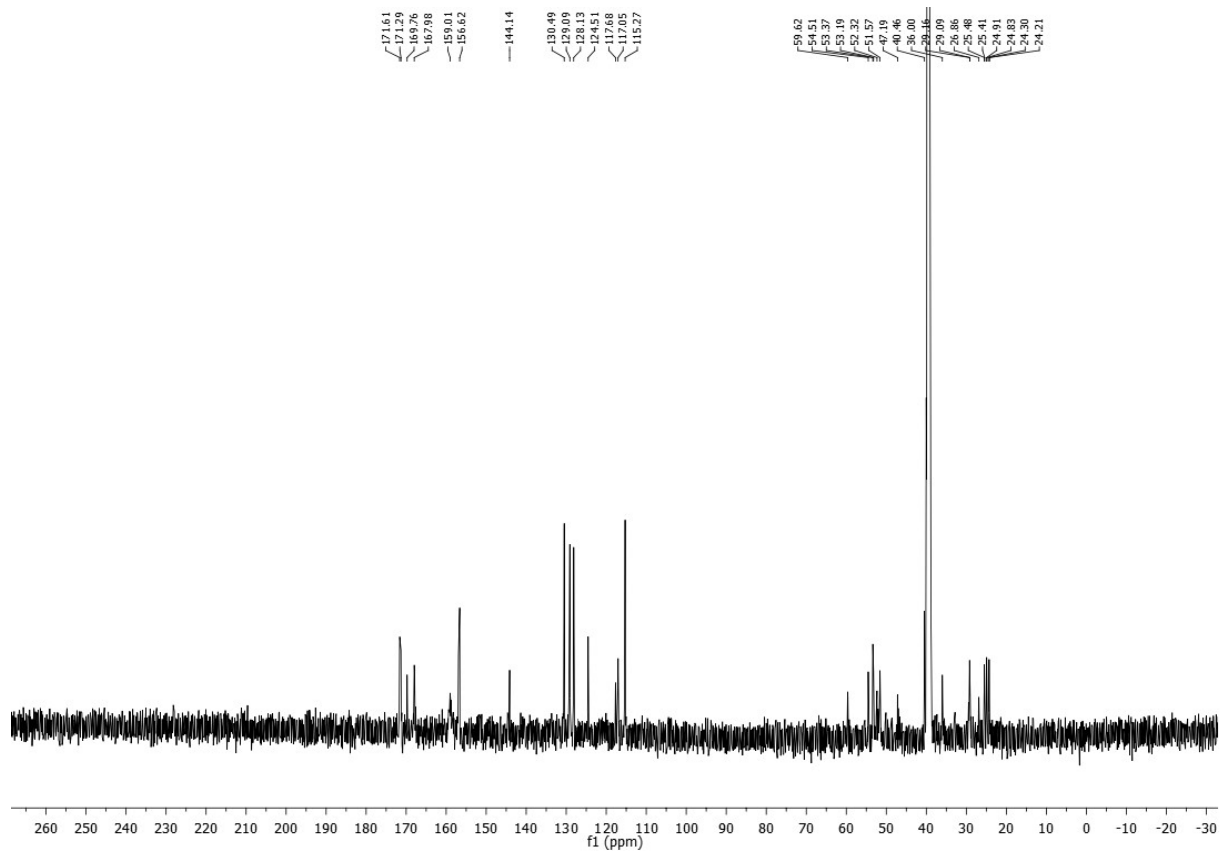

Supplement: d3ra08313f1.pdf [file d3ra08313f1.pdf]
